# Supplementary material for: Microarray Analysis of Gene Expression by Skeletal Muscle of Three Mouse Models of Kennedy Disease/Spinal Bulbar Muscular Atrophy
Source: PLoS One. 2010 Sep 23;5(9):e12922. doi: 10.1371/journal.pone.0012922 (PMC2944863; doi:10.1371/journal.pone.0012922)
Supplement: Table S2 — Complete gene list for AR97Q. Genes regulated in AR97Q Tg muscle are presented. For inclusion, each gene had to appear in the gene list generated by a 2 fold change, p≤0.05 criteria. Fold change values relative to WT controls are presented, as are Genbank accession numbers, unigene symbols and names. (0.05 MB XLS) [file pone.0012922.s002.xls]

## Sheet: Sheet1
Gene ID	AR97Q	Symbol	UniGene Name
AK009352	-81.79	Itgb1bp3	Integrin beta 1 binding protein 3
NM_145533	-33.2	Smox	Spermine oxidase
NM_007444	-21.18	Amd1	S-adenosylmethionine decarboxylase 1
NM_027052	-19.36	Slc38a4	Solute carrier family 38, member 4
NM_133232	-19.36	Pfkfb3	6-phosphofructo-2-kinase/fructose-2,6-biphosphatase 3
NM_011498	-13.07	Bhlhb2	Basic helix-loop-helix domain containing, class B2
V00818	-12.8	IGHM	immunoglobulin heavy chain 6 (heavy chain of igm)
NM_013737	-12.26	Pla2g7	Phospholipase A2, group VII
NM_013703	-11.4	Vldlr	Very low density lipoprotein receptor
NM_007606	-10.76	Car3	Carbonic anhydrase 3
NM_024291	-9.57	Ky	Kyphoscoliosis peptidase
NM_009846	-9.14	Cd24a	CD24a antigen
XM_127602	-8.79	Zmynd17	Zinc finger, MYND domain containing 17
NM_026929	-8.41	Chac1	ChaC, cation transport regulator-like 1
NM_009204	-7.99	Slc2a4	Solute carrier family 2 (facilitated glucose transporter)
NM_008525	-7.37	Alad	Aminolevulinate, delta-, dehydratase
NM_010271	-7.15	Gpd1	Glycerol-3-phosphate dehydrogenase 1 (soluble)
NM_053078	-6.92		DNA segment, human D4S114
NM_030696	-6.88	Slc16a3	Solute carrier family 16 (monocarboxylic acid transporters)
NM_010801	-6.74	Mlf1	Myeloid leukemia factor 1
NM_026346	-6.69	Fbxo32	F-box only protein 32
NM_018832	-6.48	Pdzx	PDZ domain containing, X chromosome
XM_130630	-6.46	Mylk2	Myosin, light polypeptide kinase 2, skeletal muscle
NM_011079	-6.29	Phkg1	Phosphorylase kinase gamma 1
NM_030143	-6.23	Ddit4l	DNA-damage-inducible transcript 4-like
NM_009358	-6.22	Ppp2r5d	Protein phosphatase 2, regulatory subunit B (B56)
NM_008832	-5.54	Phka1	Phosphorylase kinase alpha 1
NM_010518	-5.5	Igfbp5	Insulin-like growth factor binding protein 5
NM_025582	-5.48		RIKEN cDNA 2810405K02 gene
NM_175486	-5.38		RIKEN cDNA 6430571L13 gene
XM_283952	-5.14		Sequence AI464131
NM_009505	-5.11	Vegfa	Vascular endothelial growth factor A
NM_013456	-5.1	Actn3	Actinin alpha 3
NM_011480	-4.82	Srebf1	Sterol regulatory element binding factor 1
NM_010267	-4.69	Gdap1	Ganglioside-induced differentiation-associated-protein 1
NM_016712	-4.68	Tmod4	Tropomodulin 4
NM_025535	-4.64	Sar1b	SAR1 gene homolog B
XM_489213	-4.63	Nctc1	Mus musculus non-coding transcript 1
NM_021877	-4.35	Hr	Hairless
NM_177003	-4.27		RIKEN cDNA 9630033F20 gene
NM_008063	-4.18	Slc37a4	Solute carrier family 37 (glycerol-6-phosphate transporter)
NM_145434	-4.15	Nr1d1	Nuclear receptor subfamily 1, group D, member 1
XM_489200	-4.08		Hypothetical protein 9530064J02
NM_172904	-4.05	Fsd2	Fibronectin type III and SPRY domain containing 2
NM_027096	-4.01	Prei4	Preimplantation protein 4
NM_021329	-3.99		RIKEN cDNA 2400006H24 gene
NM_173866	-3.89	Gpt2	Glutamic pyruvate transaminase (alanine aminotransferase) 2
NM_019715	-3.89	Kcmf1	Potassium channel modulatory factor 1
NM_025734	-3.87	Kcng4	Potassium voltage-gated channel, subfamily G, member 4
NM_146010	-3.78	Tspan8	Tetraspanin 8
XM_128778	-3.74		Expressed sequence AW548124
NM_019686	-3.74	Cib2	Calcium and integrin binding family member 2
AB3083	-3.72
NM_013645	-3.71	Pvalb	Parvalbumin
AB18098	-3.65
NM_010444	-3.62	Nr4a1	Nuclear receptor subfamily 4, group A, member 1
NM_009813	-3.57	Casq1	Calsequestrin 1
NM_023395	-3.56	Wfdc1	WAP four-disulfide core domain 1
NM_009721	-3.46	Atp1b1	ATPase, Na+/K+ transporting, beta 1 polypeptide
NM_011638	-3.44	Tfrc	Transferrin receptor
NM_183312	-3.43	Dmn	Desmuslin
NM_010585	-3.43	Itpr1	Inositol 1,4,5-triphosphate receptor 1
NM_175031	-3.41	Stk36	Serine/threonine kinase 36
NM_024427	-3.37	Tpm1	Tropomyosin 1, alpha
NM_008737	-3.37	Nrp1	Neuropilin 1
NM_133703	-3.28		RIKEN cDNA 2810453I06 gene
NM_080444	-3.16	Asb10	Ankyrin repeat and SOCS box-containing protein 10
NM_026633	-3.11		RIKEN cDNA 9530058B02 gene
NM_001001491	-3.07	Tpm4	Tropomyosin 4
NM_178726	-3.05	Ppm1l	Protein phosphatase 1 (formerly 2C)-like
NM_146202	-3.05		CDNA sequence BC026432
NM_153514	-3.03	Rhobtb2	Rho-related BTB domain containing 2
NM_026530	-2.97		RIKEN cDNA E130307M08 gene
NM_178405	-2.97	Atp1a2	ATPase, Na+/K+ transporting, alpha 2 polypeptide
NM_007582	-2.95	Cacng1	Calcium channel, voltage-dependent, gamma subunit 1
NM_029095	-2.94	Gup1	Gup1, glycerol uptake/transporter homolog
NM_134118	-2.93	Gpsn2	Glycoprotein, synaptic 2
NM_026504	-2.9	Coq5	Coenzyme Q5 homolog, methyltransferase
NM_021285	-2.89	Myl1	Myosin, light polypeptide 1
AK043907	-2.88	Arl6ip2	ADP-ribosylation factor-like 6 interacting protein 2
NM_019410	-2.87	Pfn2	Profilin 2
NM_008720	-2.86	Npc1	Niemann Pick type C1
NM_027093	-2.86		RIKEN cDNA 2310003L22 gene
NM_009447	-2.85	Tuba4	Tubulin, alpha 4
NM_016854	-2.84	Ppp1r3c	Protein phosphatase 1, regulatory (inhibitor) subunit 3C
NM_177613	-2.8	Cdc34	Cell division cycle 34 homolog
AB19144	-2.79
XM_358335	-2.76	Cacna1s	Calcium channel, voltage-dependent, L type, alpha 1S
NM_016686	-2.76	Vezf1	Vascular endothelial zinc finger 1
NM_009744	-2.75	Bcl6	B-cell leukemia/lymphoma 6
NM_020604	-2.74	Jph1	Junctophilin 1
NM_017379	-2.71	Tuba8	Tubulin, alpha 8
NM_010740	-2.7	Cd93	CD93 antigen
NM_007421	-2.7	Adssl1	Adenylosuccinate synthetase like 1
AB47125	-2.68
NM_009109	-2.64	Ryr1	Ryanodine receptor 1, skeletal muscle
NM_053207	-2.64	Egln1	EGL nine homolog 1
NM_177266	-2.63	Gfm2	G elongation factor, mitochondrial 2
NM_021505	-2.61	Anapc5	Anaphase-promoting complex subunit 5
NM_027592	-2.6	Taf9	TAF9 RNA polymerase II
NM_030236	-2.59	Fbxo34	F-box only protein 34
NM_012029	-2.56	Zfp653	Zinc finger protein 653
NM_023229	-2.55	Fastk	Fas-activated serine/threonine kinase
NM_026120	-2.55		RIKEN cDNA 2410127L17 gene
NM_139297	-2.54	Ugp2	UDP-glucose pyrophosphorylase 2
NM_026030	-2.54	Eif2s2	Eukaryotic translation initiation factor 2, subunit 2 (beta)
NM_009832	-2.53	Ccnk	Cyclin K
NM_153744	-2.51	Prkag3	Protein kinase, AMP-activated, gamma 3
NM_011361	-2.5	Sgk	Serum/glucocorticoid regulated kinase
NM_024171	-2.5	Sec61b	Sec61 beta subunit
NM_008914	-2.48	Ppp3cb	Protein phosphatase 3, catalytic subunit, beta isoform
NM_009790	-2.48	Calm1	Calmodulin 1
AB48061	-2.46
NM_026853	-2.41	Asb11	Ankyrin repeat and SOCS box-containing protein 11
NM_134052	-2.39	Adi1	Acireductone dioxygenase 1
NM_018884	-2.38	Pdzrn3	PDZ domain containing RING finger 3
NM_080464	-2.37	Ppp1r3a	Protein phosphatase 1, regulatory (inhibitor) subunit 3A
NM_025508	-2.35	Gmpr	Guanosine monophosphate reductase
NM_029339	-2.31		RIKEN cDNA 1700023O11 gene
NM_026398	-2.29	Pop5	Processing of precursor 5, ribonuclease P/MRP family
NM_023049	-2.28	Asb2	Ankyrin repeat and SOCS box-containing protein 2
NM_007908	-2.26	Eef2k	Eukaryotic elongation factor-2 kinase
NM_021299	-2.26	Ak3	Adenylate kinase 3
NM_175935	-2.25	G6pc3	Glucose 6 phosphatase, catalytic, 3
NM_201407	-2.23	Dennd4b	DENN/MADD domain containing 4B
NM_011125	-2.23	Pltp	Phospholipid transfer protein
NM_013590	-2.22	Lzp-s	P lysozyme structural
NM_008509	-2.21	Lpl	Lipoprotein lipase
NM_138314	-2.18	Nme7	Non-metastatic cells 7, protein expressed in
NM_021477	-2.17	A2bp1	Ataxin 2 binding protein 1
NM_008808	-2.15	Pdgfa	Platelet derived growth factor, alpha
NM_007808	-2.12	Cycs	Cytochrome c, somatic
NM_016872	-2.08	Vamp5	Vesicle-associated membrane protein 5
NM_025576	-2.06	Ptpmt1	Protein tyrosine phosphatase, mitochondrial 1
NM_021430	-2.05		RIKEN cDNA 2900002H16 gene
NM_013646	-2.05	Rora	RAR-related orphan receptor alpha
NM_011049	-2.05	Pctk1	PCTAIRE-motif protein kinase 1
NM_178593	-2.04	Rcsd1	RCSD domain containing 1
NM_016802	2.02	Rhoa	Ras homolog gene family, member A
NM_009368	2.09	Tgfb3	Transforming growth factor, beta 3
NM_008441	2.11	Kif1b	Kinesin family member 1B
NM_026406	2.12	Zfp364	Zinc finger protein 364
NM_033321	2.13	P2rx5	Purinergic receptor P2X, ligand-gated ion channel, 5
NM_033268	2.13	Actn2	Actinin alpha 2
NM_020005	2.13	Pcaf	P300/CBP-associated factor
NM_022417	2.15	Itm2c	Integral membrane protein 2C
NM_025894	2.2	Psmd12	Proteasome, 26S subunit, non-ATPase, 12
NM_134064	2.23	Rnf44	Ring finger protein 44
NM_008517	2.32	Lta4h	Leukotriene A4 hydrolase
NM_011654	2.32	Tuba2	Tubulin, alpha 2
NM_025494	2.33	Atp6v1c1	ATPase, H+ transporting, V1 subunit C, isoform 1
NM_029791	2.36	Bicd2	Bicaudal D homolog 2
NM_020590	2.37	Gabarapl1	Gamma-aminobutyric acid (GABA(A)) receptor-associated protein-like 1
NM_011847	2.39	Dnajb6	DnaJ (Hsp40) homolog, subfamily B, member 6
NM_027016	2.45	Tloc1	Translocation protein 1
NM_019930	2.46	Ranbp9	RAN binding protein 9
NM_011175	2.46	Lgmn	Legumain
NM_207530	2.51	Osbpl1a	Oxysterol binding protein-like 1A
AB46113	2.53
NM_009938	2.65	Copa	Coatomer protein complex subunit alpha
NM_144521	2.68		RIKEN cDNA 1110031B06 gene
NM_028803	2.68	Gbe1	Glucan (1,4-alpha-), branching enzyme 1
NM_013602	2.69	Mt1	Metallothionein 1
NM_178188	2.71	Hist1h2ad	Histone 1, H2ad
NM_027439	2.84	Atp6ap2	ATPase, H+ transporting, lysosomal accessory protein 2
NM_010838	2.85	Mapt	Microtubule-associated protein tau
NM_133803	2.86	Dpp3	Dipeptidylpeptidase 3
NM_009794	3	Capn2	Calpain 2
NM_019466	3	Dscr1	Down syndrome critical region homolog 1
NM_019684	3.04	Stk23	Serine/threonine kinase 23
NM_009112	3.06	S100a10	S100 calcium binding protein A10 (calpactin)
XM_148959	3.07	Sctr	Secretin receptor
NM_008706	3.14	Nqo1	NAD(P)H dehydrogenase, quinone 1
NM_009166	3.22	Sorbs1	Sorbin and SH3 domain containing 1
NM_029166	3.27		RIKEN cDNA E030041M21 gene
NM_018808	3.28	Dnajb1	DnaJ (Hsp40) homolog, subfamily B, member 1
NM_144895	3.29	Spg20	Spastic paraplegia 20, spartin (Troyer syndrome) homolog
NM_010358	3.29	Gstm1	Glutathione S-transferase, mu 1
AB29055	3.31
NM_172275	3.33	Trafd1	TRAF type zinc finger domain containing 1
NM_009608	3.34	Actc1	Actin, alpha, cardiac
NM_013868	3.39	Hspb7	Heat shock protein family, member 7 (cardiovascular)
NM_011586	3.47	Myo18a	Myosin XVIIIa
NM_019787	3.62	Sec23b	SEC23B (S. cerevisiae)
NM_029688	3.64	Srxn1	Sulfiredoxin 1 homolog
NM_019390	3.67	Lmna	Lamin A
NM_025861	3.72	Pqlc1	PQ loop repeat containing 1
NM_183308	3.79	Pon2	Paraoxonase 2
NM_175482	3.81	Usp28	Ubiquitin specific peptidase 28
NM_030152	3.94	Nol3	Nucleolar protein 3 (apoptosis repressor with CARD domain)
NM_010135	3.97	Enah	Enabled homolog (Drosophila)
NM_028755	3.99	Arpp21	Cyclic AMP-regulated phosphoprotein, 21
NM_146008	4.02	Tcp11l2	T-complex 11 (mouse) like 2
NM_010468	4.08	Hoxd3	Homeo box D3
NM_007389	4.13	Chrna1	Cholinergic receptor, nicotinic(acetylcholine receptor ), alpha polypeptide 1
NM_133838	4.13	Ehd4	EH-domain containing 4
NM_028021	4.41	Myh14	Myosin, heavy polypeptide 14
NM_019632	4.51	Napb	N-ethylmaleimide sensitive fusion protein attachment protein beta
XM_354836	4.51	Lmo7	LIM domain only 7
NM_172767	4.63	Loh11cr2a	Loss of heterozygosity, 11, chromosomal region 2, gene A
NM_009601	4.89	Chrnb1	Cholinergic receptor, nicotinic(acetylcholine receptor )
NM_009052	5.57	Bex1	Brain expressed gene 1
NM_013808	5.74	Csrp3	Cysteine and glycine-rich protein 3
NM_028636	5.94	Man2c1	Mannosidase, alpha, class 2C, member 1
NM_138956	6.09	Rassf3	Ras association (RalGDS/AF-6) domain family 3
NM_010113	6.1	Egf	Epidermal growth factor
NM_027104	6.43		RIKEN cDNA 2310002L09 gene
NM_007738	6.43	Col7a1	Procollagen, type VII, alpha 1
NM_133768	6.48	Asl	Argininosuccinate lyase
XM_358324	6.55	Cul7	Cullin 7
NM_030700	6.57	Maged2	Melanoma antigen, family D, 2
NM_016861	6.88	Pdlim1	PDZ and LIM domain 1 (elfin)
XM_136051	7.19	Tceal7	Transcription elongation factor A (SII)-like 7
NM_019791	8.14	Maged1	Melanoma antigen, family D, 1
NM_007836	8.69	Gadd45a	Growth arrest and DNA-damage-inducible 45 alpha
NM_181390	11.01	Mustn1	Musculoskeletal, embryonic nuclear protein 1
NM_145984	12.87	Prepl	Prolyl endopeptidase-like
NM_013468	16.68	Ankrd1	Ankyrin repeat domain 1 (cardiac muscle)
