# Supplementary material for: Microarray Analysis of Gene Expression by Skeletal Muscle of Three Mouse Models of Kennedy Disease/Spinal Bulbar Muscular Atrophy
Source: PLoS One. 2010 Sep 23;5(9):e12922. doi: 10.1371/journal.pone.0012922 (PMC2944863; doi:10.1371/journal.pone.0012922)
Supplement: Table S5 — The list of up- and down-regulated genes found only in PolyQ models. Genes regulated in all 3 models are presented. For inclusion, each gene had to appear in the gene list generated by a 2 fold change, p≤0.05 criteria in AR97Q and AR113Q models. Fold change values are presented for each model as are Genbank accession numbers, unigene symbols and names. In addition, genes that have been reported to be regulated in skeletal muscle of related conditions are identified: ARKO = genes also identified in microarray analysis of skeletal muscle of AR null mice, Atrophy = genes also identified in microarray analysis of skeletal muscle of diverse conditions resulting in muscular atrophy, HD = genes also identified in microarray analysis of skeletal muscle of mouse model of Huntington's disease. (0.02 MB XLS) [file pone.0012922.s005.xls]

## Sheet: Sheet1
Gene ID	AR97Q	AR113Q	Symbol	UniGene Name	Other models
NM_027052	-19.36	-4.11	Slc38a4	Solute carrier family 38, member 4	ARKO
NM_013703	-11.4	-3.61	Vldlr	Very low density lipoprotein receptor	HD, Atrophy
NM_007606	-10.76	-3.82	Car3	Carbonic anhydrase 3
NM_030696	-6.88	-3.57	Slc16a3	Solute carrier family 16
NM_010518	-5.5	-2.33	Igfbp5	Insulin-like growth factor binding protein 5	HD, Atrophy
NM_009505	-5.11	-2.22	Vegfa	Vascular endothelial growth factor A
NM_145434	-4.15	-2.29	Nr1d1	Nuclear receptor subfamily 1, group D	HD
XM_489200	-4.08	-7.25		Hypothetical protein
NM_172904	-4.05	-2.14	Fsd2	Fibronectin type III and SPRY domain containing 2
NM_019715	-3.89	-4.23	Kcmf1	Potassium channel modulatory factor 1
NM_010444	-3.62	-3.26	Nr4a1	Nuclear receptor subfamily 4, group A, member 1	Atrophy
NM_011638	-3.44	-3.62	Tfrc	Transferrin receptor
NM_178405	-2.97	-2.55	Atp1a2	ATPase, Na+/K+ transporting, alpha 2 polypeptide
NM_016854	-2.84	-6.2	Ppp1r3c	Protein phosphatase 1, regulatory subunit 3C
NM_016686	-2.76	-2.97	Vezf1	Vascular endothelial zinc finger 1
NM_012029	-2.56	-2.31	Zfp653	Zinc finger protein 653
NM_023229	-2.55	-2.06	Fastk	Fas-activated serine/threonine kinase
NM_139297	-2.54	-2.19	Ugp2	UDP-glucose pyrophosphorylase 2	Atrophy
NM_011361	-2.5	-9.6	Sgk	Serum/glucocorticoid regulated kinase
NM_024171	-2.5	-2.57	Sec61b	Sec61 beta subunit
NM_026853	-2.41	-2.06	Asb11	Ankyrin repeat and SOCS box-containing protein 11
NM_026398	-2.29	-3.05	Pop5	Processing of precursor 5
NM_020005	2.13	3.01	Pcaf	P300/CBP-associated factor	HD
NM_008517	2.32	2.15	Lta4h	Leukotriene A4 hydrolase
NM_011847	2.39	2.43	Dnajb6	DnaJ (Hsp40) homolog, subfamily B, member 6
NM_027016	2.45	2.08	Tloc1	Translocation protein 1
NM_027439	2.84	2.76	Atp6ap2	ATPase, H+ transporting, lysosomal accessory protein 2
XM_148959	3.07	7.37	Sctr	Secretin receptor
NM_029166	3.27	2.17		RIKEN cDNA E030041M21 gene
NM_144895	3.29	3	Spg20	Spastic paraplegia 20
NM_146008	4.02	2.5	Tcp11l2	T-complex 11 like 2
NM_010468	4.08	4.91	Hoxd3	Homeo box D3
NM_133838	4.13	3.2	Ehd4	EH-domain containing 4
XM_354836	4.51	2.74	Lmo7	LIM domain only 7
NM_172767	4.63	9.7	Loh11cr2a	Loss of heterozygosity, 11, chromosomal region 2
NM_009052	5.57	3.3	Bex1	Brain expressed gene 1
NM_030700	6.57	3.32	Maged2	Melanoma antigen, family D2	HD
XM_136051	7.19	4.76	Tceal7	Transcription elongation factor A (SII)-like 7	ARKO
NM_019791	8.14	3.35	Maged1	Melanoma antigen, family D, 1	HD
NM_145984	12.87	9.22	Prepl	Prolyl endopeptidase-like
